# Supplementary material for: Machine Learning-Based Integration of High-Resolution Wildfire Smoke Simulations and Observations for Regional Health Impact Assessment
Source: Int J Environ Res Public Health. 2019 Jun 17;16(12):2137. doi: 10.3390/ijerph16122137 (PMC6617359; doi:10.3390/ijerph16122137)
Supplement: Supplementary file 1 [file ijerph-16-02137-s001.pdf]

# Machine Learning-Based Integration of High-Resolution Wildfire Smoke Simulations and Observations for Regional Health Impact Assessment

Yufei Zou <sup>1,\*</sup>, Susan M. O'Neill <sup>2</sup>, Narasimhan K. Larkin <sup>2</sup>, Ernesto C. Alvarado <sup>1</sup>, Robert Solomon <sup>1</sup>, Clifford Mass <sup>3</sup>, Yang Liu <sup>4</sup>, M. Talat Odman <sup>5</sup>, and Huizhong Shen <sup>5</sup>

<sup>1</sup> School of Environmental and Forest Sciences, University of Washington, Seattle, WA 98195, USA; [alvarado@uw.edu](mailto:alvarado@uw.edu) (E.C.A.); [robert.airfire@gmail.com](mailto:robert.airfire@gmail.com) (R.S.)

<sup>2</sup> Pacific Wildland Fire Sciences Laboratory, U.S. Forest Service, Seattle, WA 98103, USA; [smoneill@fs.fed.us](mailto:smoneill@fs.fed.us) (S.M.O.); [larkin@fs.fed.us](mailto:larkin@fs.fed.us) (N.K.L.)

<sup>3</sup> Department of Atmospheric Sciences, University of Washington, Seattle, WA 98195, USA; [cmass@uw.edu](mailto:cmass@uw.edu)

<sup>4</sup> Rollins School of Public Health, Emory University, Atlanta, GA 30322, USA; [yang.liu@emory.edu](mailto:yang.liu@emory.edu)

<sup>5</sup> School of Civil and Environmental Engineering, Georgia Institute of Technology, Atlanta, GA 30332, USA; [talat.odman@ce.gatech.edu](mailto:talat.odman@ce.gatech.edu) (M.T.O.); [shenhz2008@gmail.com](mailto:shenhz2008@gmail.com) (H.S.)

\* Correspondence: [yzou2017@uw.edu](mailto:yzou2017@uw.edu);

## Contents of this file:

Equations S1-S4

Figures S1-S5

Figure S1. The statistics of (a) spatial correlation coefficients and (b) RMSE values for all AOD modeling results from 08/15/2017 to 09/14/2017.

Figure S2. The CATS overpass track (the green line) over the WRF-CMAQ surface PM<sub>2.5</sub> concentration field (color shading; unit:  $\mu\text{g m}^{-3}$ ) from the SENS experiment at 11:00 UTC (04:00 PDT) on 09/07/2017.

Figure S3. Modeling performance comparison in terms of RMSE with different *mtry* parameter settings in the RF method.

Figure S4. Modeling performance comparison in terms of RMSE with different *shrinkage* and *interaction.depth* parameter settings in the GBM method.

Figure S5. Comparisons of the non-fire CMAQ\_CTRL simulated PM<sub>2.5</sub> surface concentrations with the AirNow ground observations in June-July, 2017, before the fire episode. (a) monthly averaged PM<sub>2.5</sub> concentrations (unit:  $\mu\text{g m}^{-3}$ ) based on the AirNow observations; (b) fractional biases (unit: 100%) based on the monthly averaged CMAQ\_CTRL simulations and the AirNow observations.

**Equations:**

The equations of statistical metrics used for the modeling performance evaluation and comparison in the main text are listed below:

Mean absolute error (MAE):

$$MAE = \frac{\sum_i^n abs(\hat{y}_i - y_i)}{n}, \quad (S1)$$

Fractional bias (FB):

$$FB = \frac{\sum_i^n (\hat{y}_i - y_i)}{\sum_i^n y_i} \times 100\%, \quad (S2)$$

R-squared ( $R^2$ ):

$$R^2 = \frac{\sum_i^n (\hat{y}_i - \bar{y})^2}{\sum_i^n (y_i - \bar{y})^2} = 1 - \frac{\sum_i^n (y_i - \hat{y}_i)^2}{\sum_i^n (y_i - \bar{y})^2}, \quad (S3)$$

Root mean squared error (RMSE):

$$RMSE = \sqrt{\frac{\sum_i^n (\hat{y}_i - y_i)^2}{n}}, \quad (S4)$$

In Equations S1-S4,  $y_i$  is the  $i^{\text{th}}$  observed value,  $\hat{y}_i$  is the  $i^{\text{th}}$  predicted value,  $\bar{y}$  is the mean value of all observations, and  $n$  is the sample size of observations.

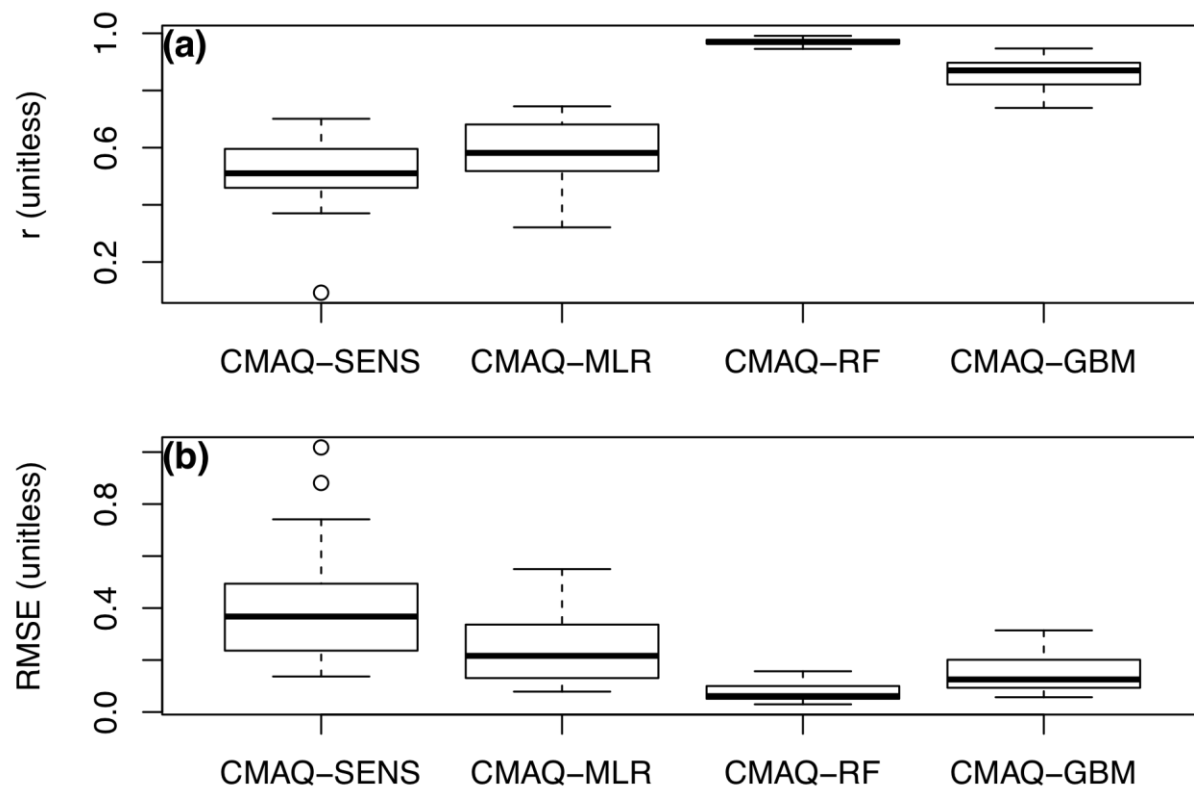

**Figure S1.** The statistics of (a) spatial correlation coefficients and (b) RMSE values for all AOD modeling results from 08/15/2017 to 09/14/2017.

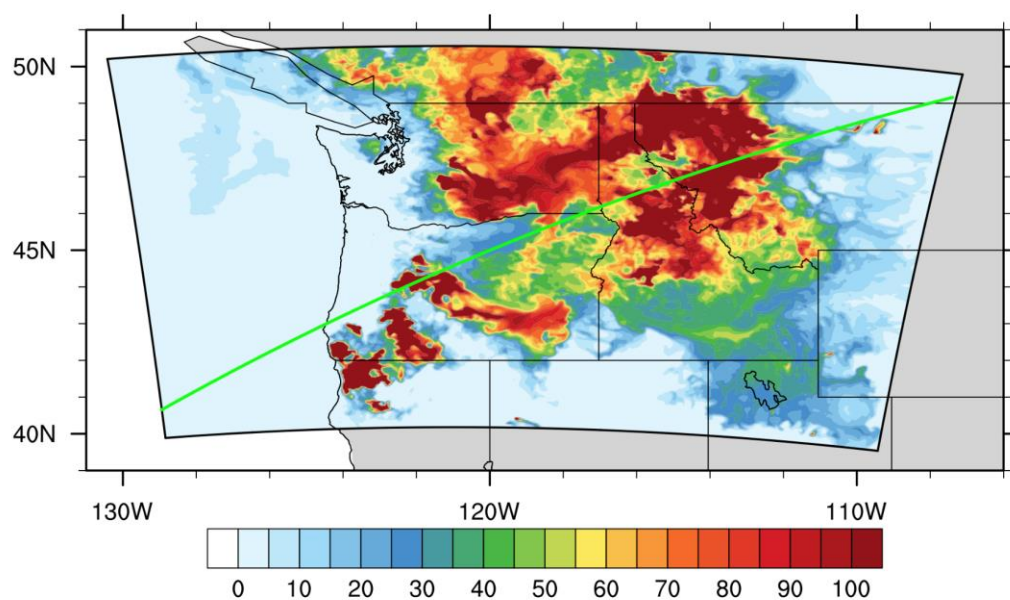

**Figure S2.** The CATS overpass track (the green line) over the WRF-CMAQ surface PM<sub>2.5</sub> concentration field (color shading; unit:  $\mu\text{g m}^{-3}$ ) from the SENS experiment at 11:00 UTC (04:00 PDT) on 09/07/2017.

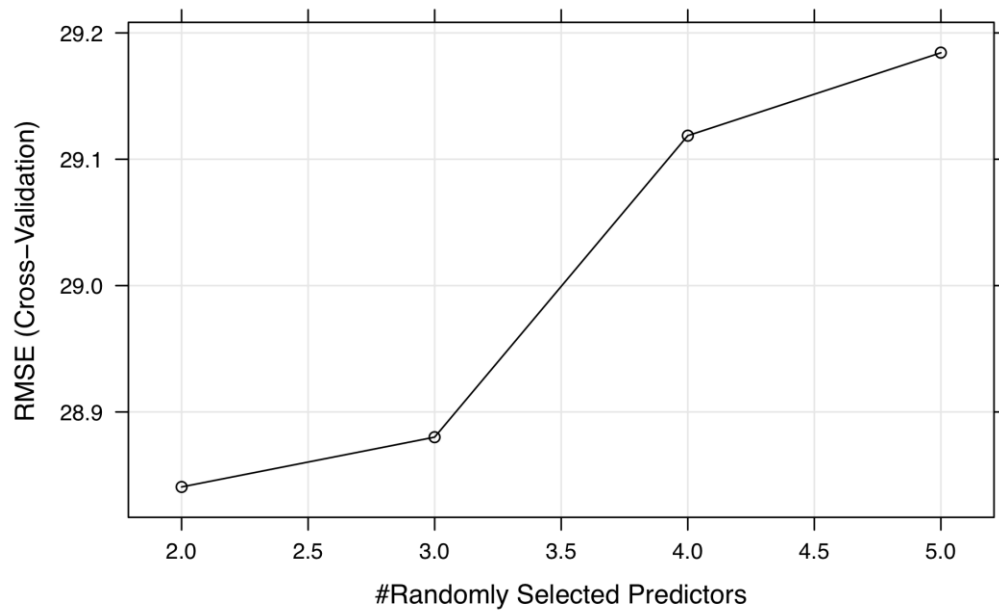

**Figure S3.** The modeling performance comparison in terms of RMSE with different *mtry* parameter settings in the RF method. Here *mtry* is the number of variables randomly sampled as candidates at each split.

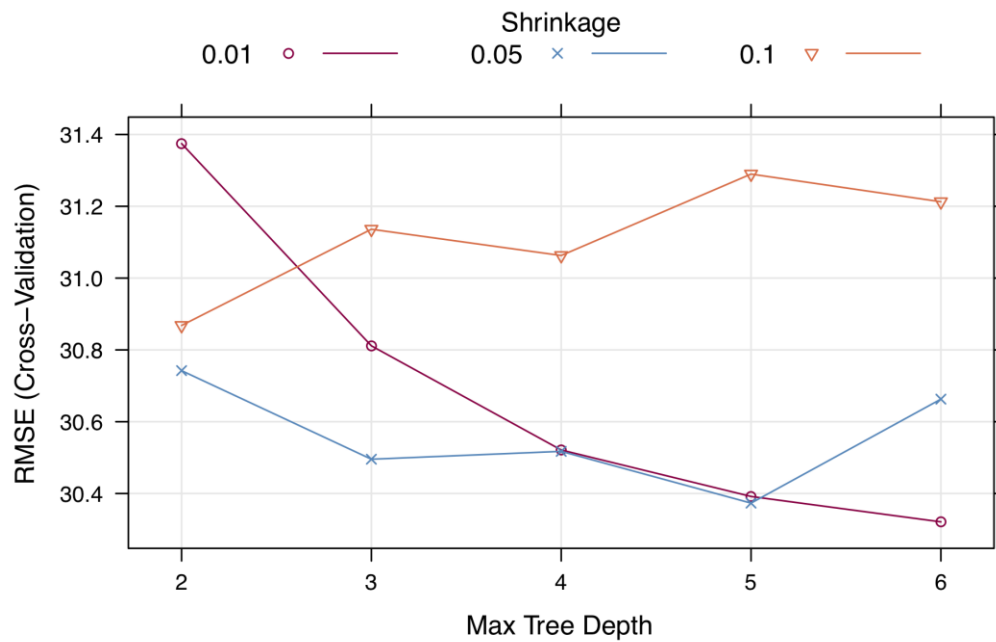

**Figure S4.** The modeling performance comparison in terms of RMSE with different *shrinkage* and *interaction.depth* parameter settings in the GBM method. Here *shrinkage* is the learning rate applied to each tree in the expansion, and *interaction.depth* is the maximum depth of each tree allowing variable interactions.

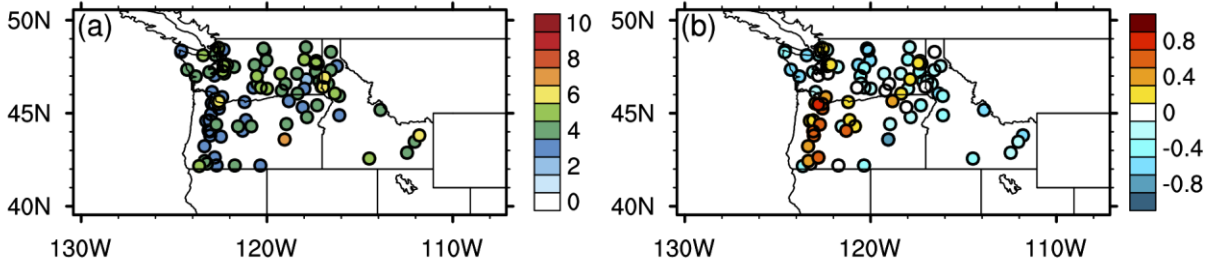

**Figure S5.** Comparisons of the non-fire CMAQ\_CTRL simulated PM<sub>2.5</sub> surface concentrations with the AirNow ground observations in June-July, 2017, before the fire episode. (a) monthly averaged PM<sub>2.5</sub> concentrations (unit:  $\mu\text{g m}^{-3}$ ) based on the AirNow observations; (b) fractional biases (unit: 100%) based on the monthly averaged CMAQ\_CTRL simulations and the AirNow observations;
